# Supplementary material for: Sodium + /taurocholate cotransporting polypeptide as target therapy for liver fibrosis
Source: HighWire-hosted journal article supplement (doi:10.1136/gutjnl-2020-323345), 2021-07-15

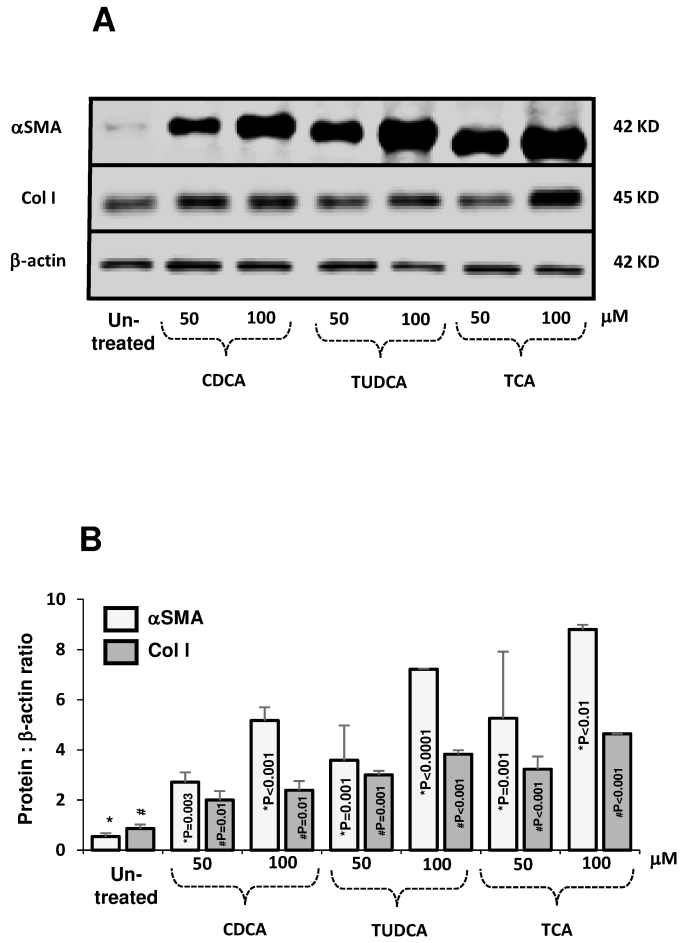

Supplement: gutjnl-2020-323345supp002_data_supplement.pdf [file gutjnl-2020-323345supp002_data_supplement.pdf]
