# Supplementary figures and images for: Sodium+/taurocholate cotransporting polypeptide as target therapy for liver fibrosis
Source: PubMed Central journal article supplement — Gut. 2021 Jul 15;71(7):1373–85. doi: 10.1136/gutjnl-2020-323345 (PMC9185811; doi:10.1136/gutjnl-2020-323345), 2021-07-15

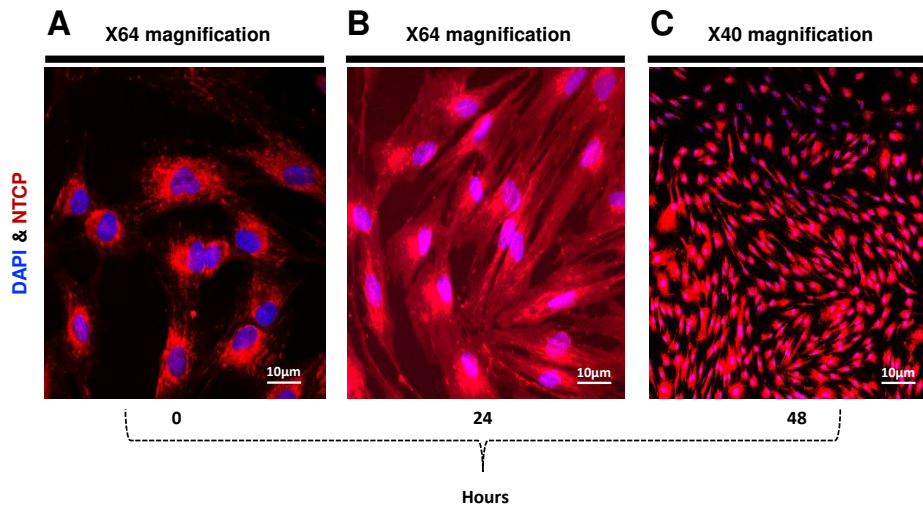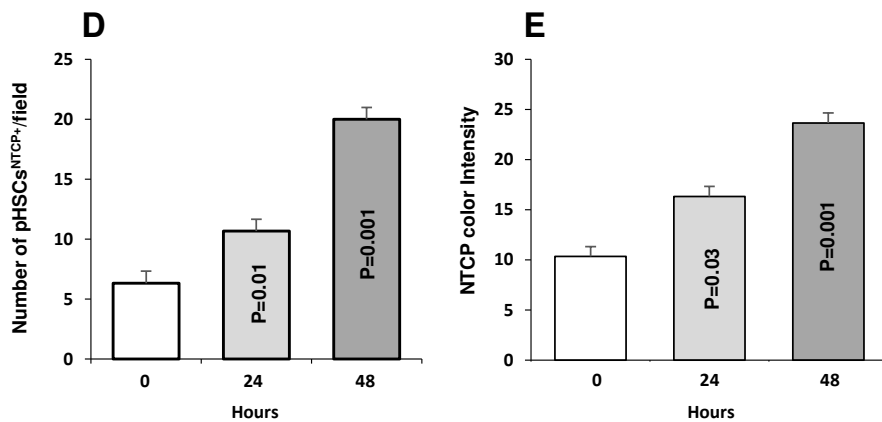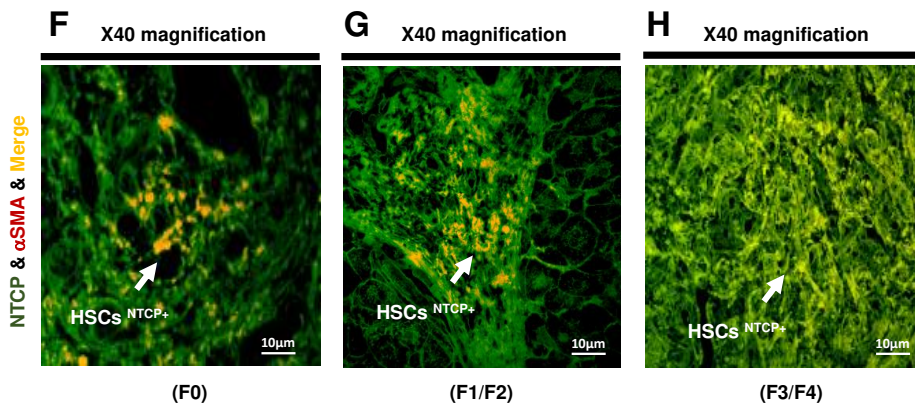

### Liver biopsy

Supplement: gutjnl-2020-323345supp001.pdf [file gutjnl-2020-323345supp001.pdf]

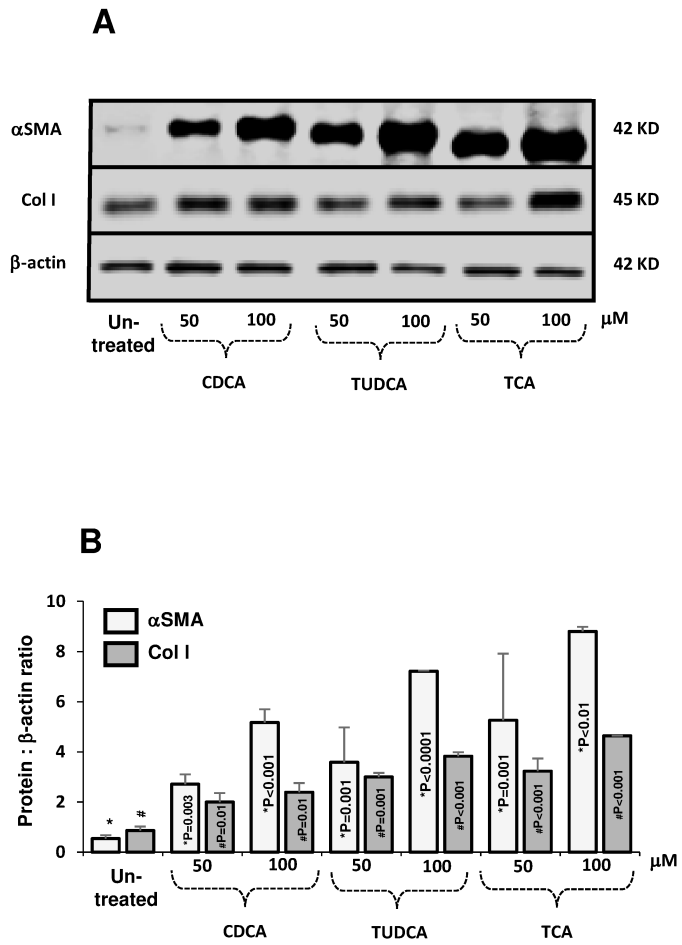

Supplement: gutjnl-2020-323345supp002.pdf [file gutjnl-2020-323345supp002.pdf]

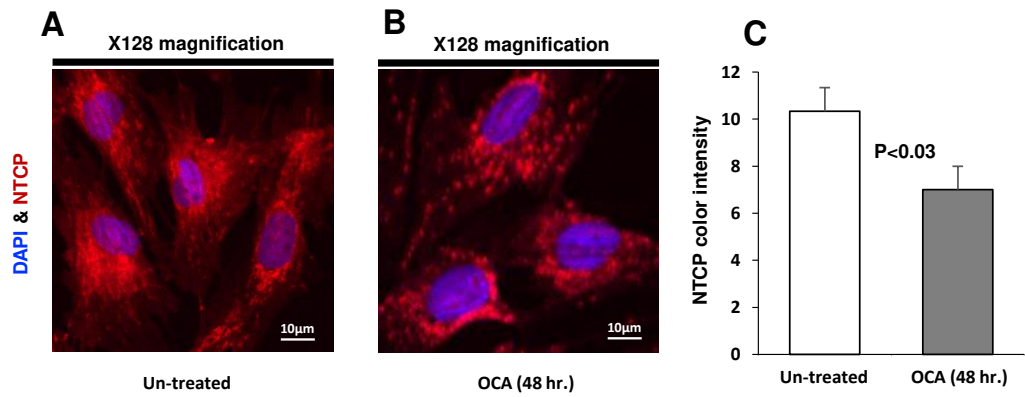

Supplement: gutjnl-2020-323345supp004.pdf [file gutjnl-2020-323345supp004.pdf]
